# Supplementary material for: Reproducible magnetic carbon nanocomposites derived from polystyrene with superior tetrabromobisphenol A adsorption performance
Source: Royal Society of Chemistry journal article supplement (doi:10.1039/c6ta03757g), 2016-01-01
Supplement: c6ta03757g1.pdf [file c6ta03757g1.pdf]

## Supporting information

### **Magnetic Carbon Nanocomposites Derived from Polystyrene with Superior Tetrabromobisphenol A Adsorption Performance**

Hongbo Gu,<sup>1</sup> Han Lou,<sup>1</sup> Jinlin Tian,<sup>2</sup> Shulin Liu,<sup>2</sup> Yulin Tang<sup>2,\*</sup>

<sup>1</sup>Shanghai Key Lab of Chemical Assessment and Sustainability, Department of  
Chemistry, Tongji University, Shanghai 200092, People's Republic of China

<sup>2</sup>State Key Laboratory of Pollution Control and Resource Reuse, College of  
Environmental Science & Engineering, Tongji University, Shanghai 200092, People's  
Republic of China

\*Corresponding author

E-mail: [tangtongji@126.com](mailto:tangtongji@126.com)

### S1. Chemical Structure of TBBPA:

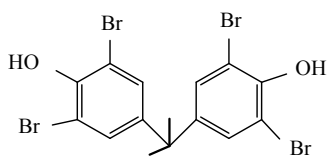

Figure S1. Chemical structure of TBBPA.

### S2. Chemical Structure of Humic Acid:

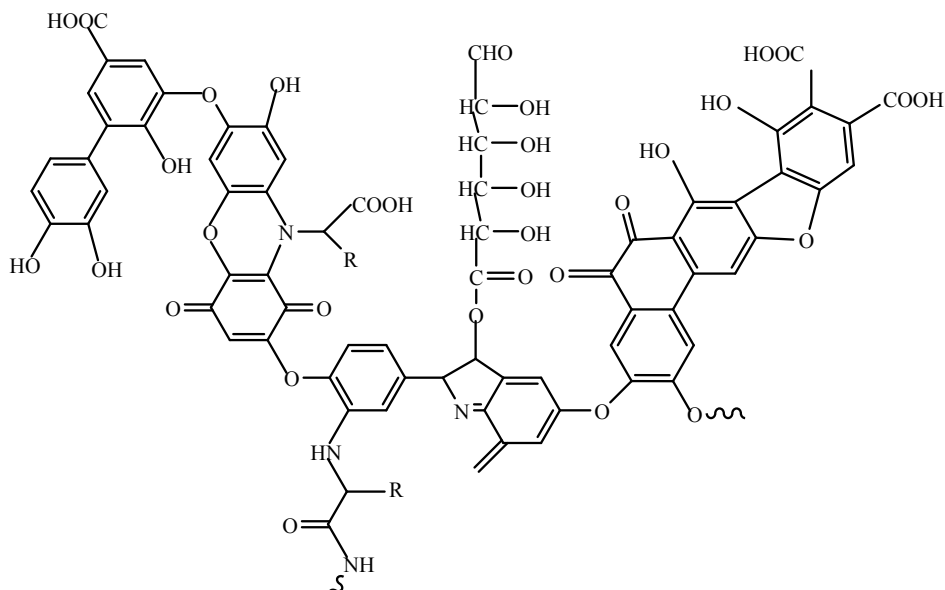

Figure S2. Chemical structure of humic acid.

### S3. $\Delta H^0$ and $\Delta S^0$ Determination:

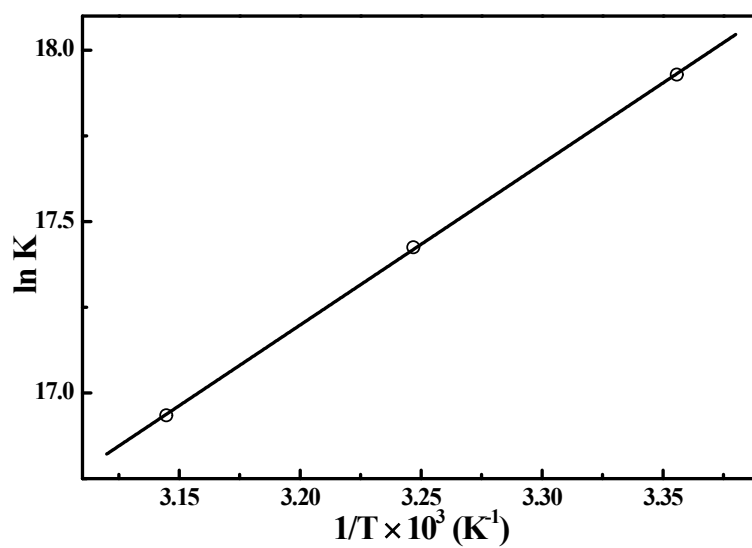

Figure S3. Plot of  $\ln K$  vs.  $1/T \times 10^3$  for adsorption of TBBPA onto MPSN.

#### S4. TBBPA Species Distribution in Different pH Solution:

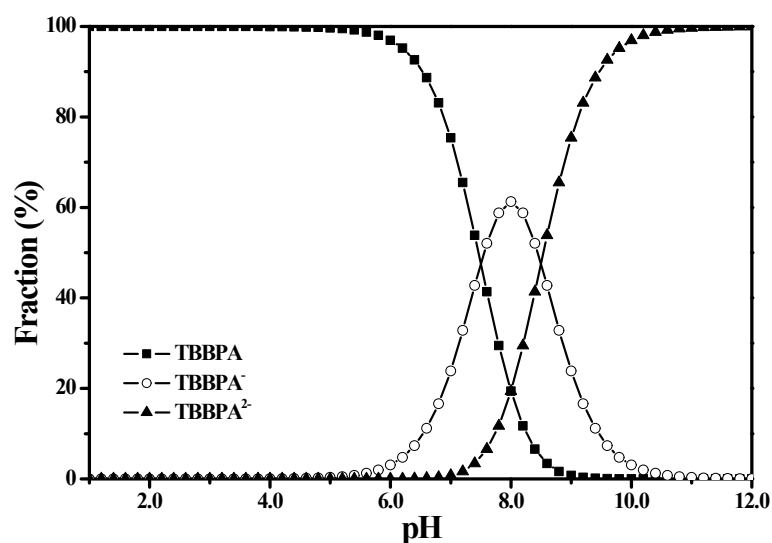

**Figure S4.** Species distribution of TBBPA as a function of pH (TBBPA = undissociated, TBBPA<sup>-</sup> = monoprotic, TBBPA<sup>2-</sup> = diprotic)<sup>1,2</sup>

#### S5. Adsorption Mechanism Exploration: FT-IR

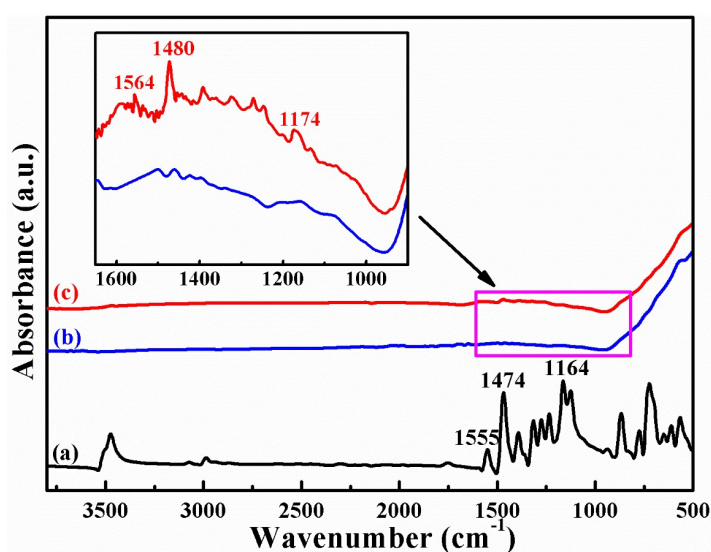

**Figure S5.** FT-IR spectra of (a) TBBPA, (b) MPSN, (c) after adsorption of MPSN. The inset shows the partial enlarged image from 900 - 1600 cm<sup>-1</sup> of (b) and (c).

#### References:

- 1 Y. Zhang, Y. Tang, S. Li and S. Yu, *Chem. Eng. J.*, 2013, **222**, 94-100.
- 2 Y. Bao and J. Niu, *Chemosphere* 2015, **134**, 550-556.
